# Supplementary material for: Natural Deep Eutectic Solvents for Solubility and Selective Fractionation of Bioactive Low Molecular Weight Carbohydrates
Source: MDPI journal article supplement (doi:10.3390/foods12234355), 2023-12-02

Figure S1. FT-IR spectra of chloride choline (ChCl), ethylene glycol (EtG) and NADES1 (ChCl:EtG).

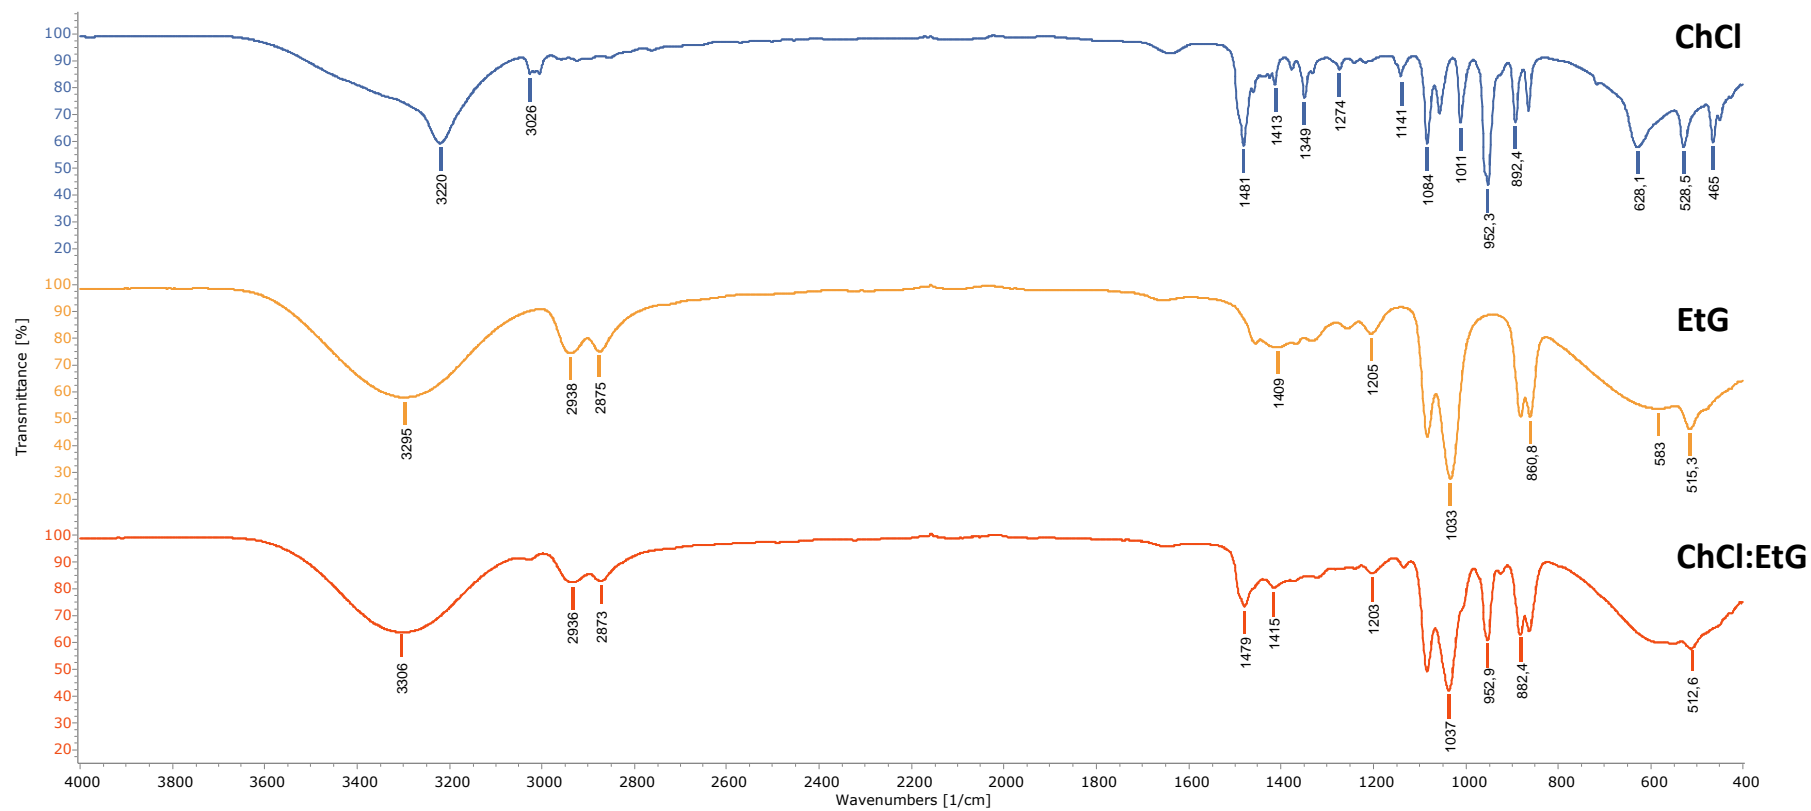

Figure S2. FT-IR spectra of chloride choline (ChCl), glycerol (Gly) and NADES2 (ChCl:Gly).

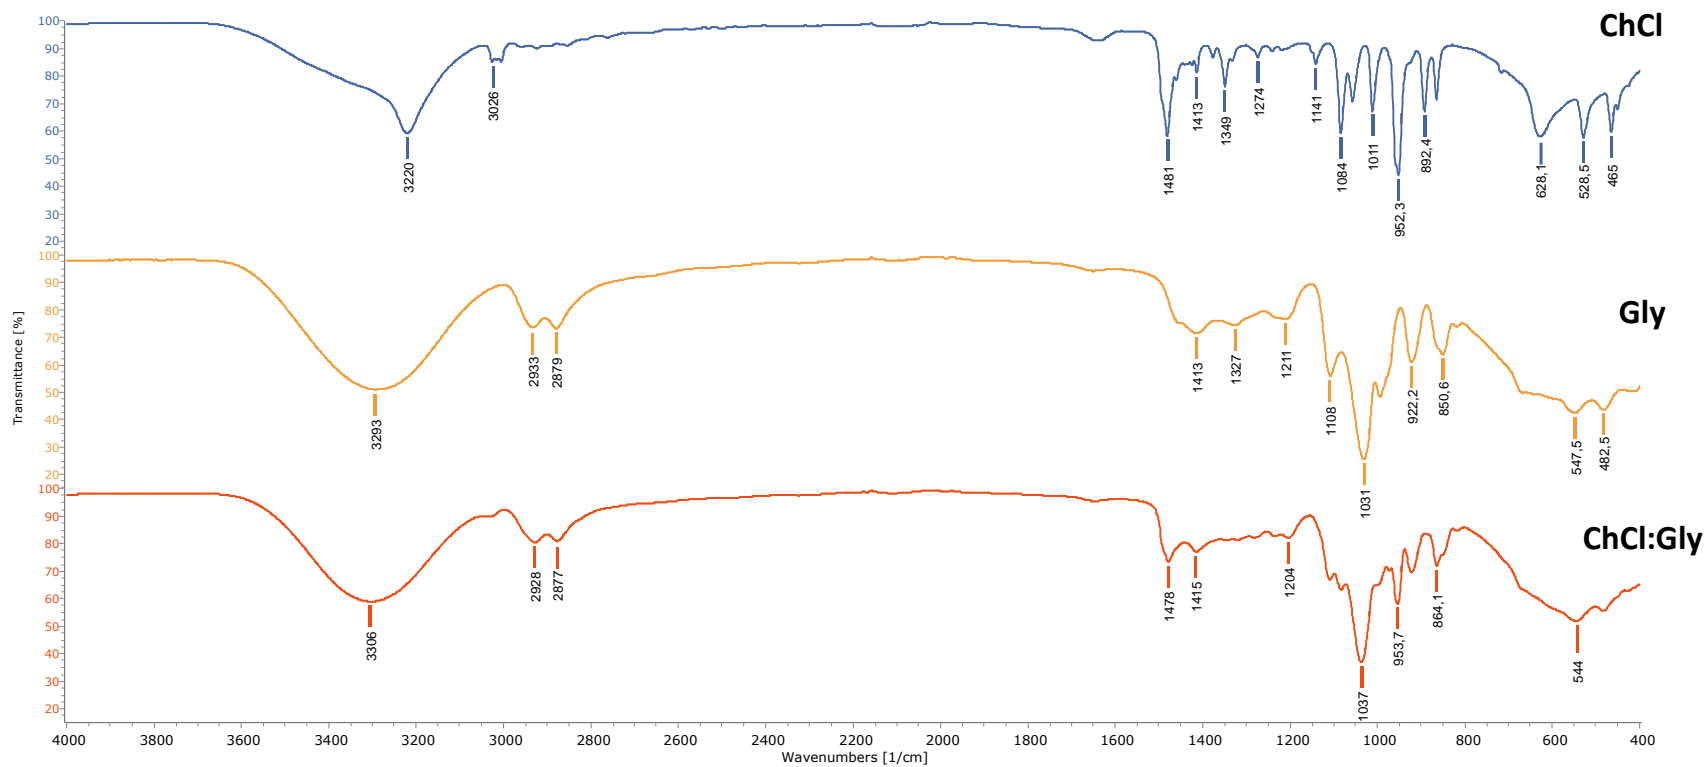

Figure S3. FT-IR spectra of chloride choline (ChCl), oxalic acid dihydrate (Eth) and NADES3 (ChCl:Eth).

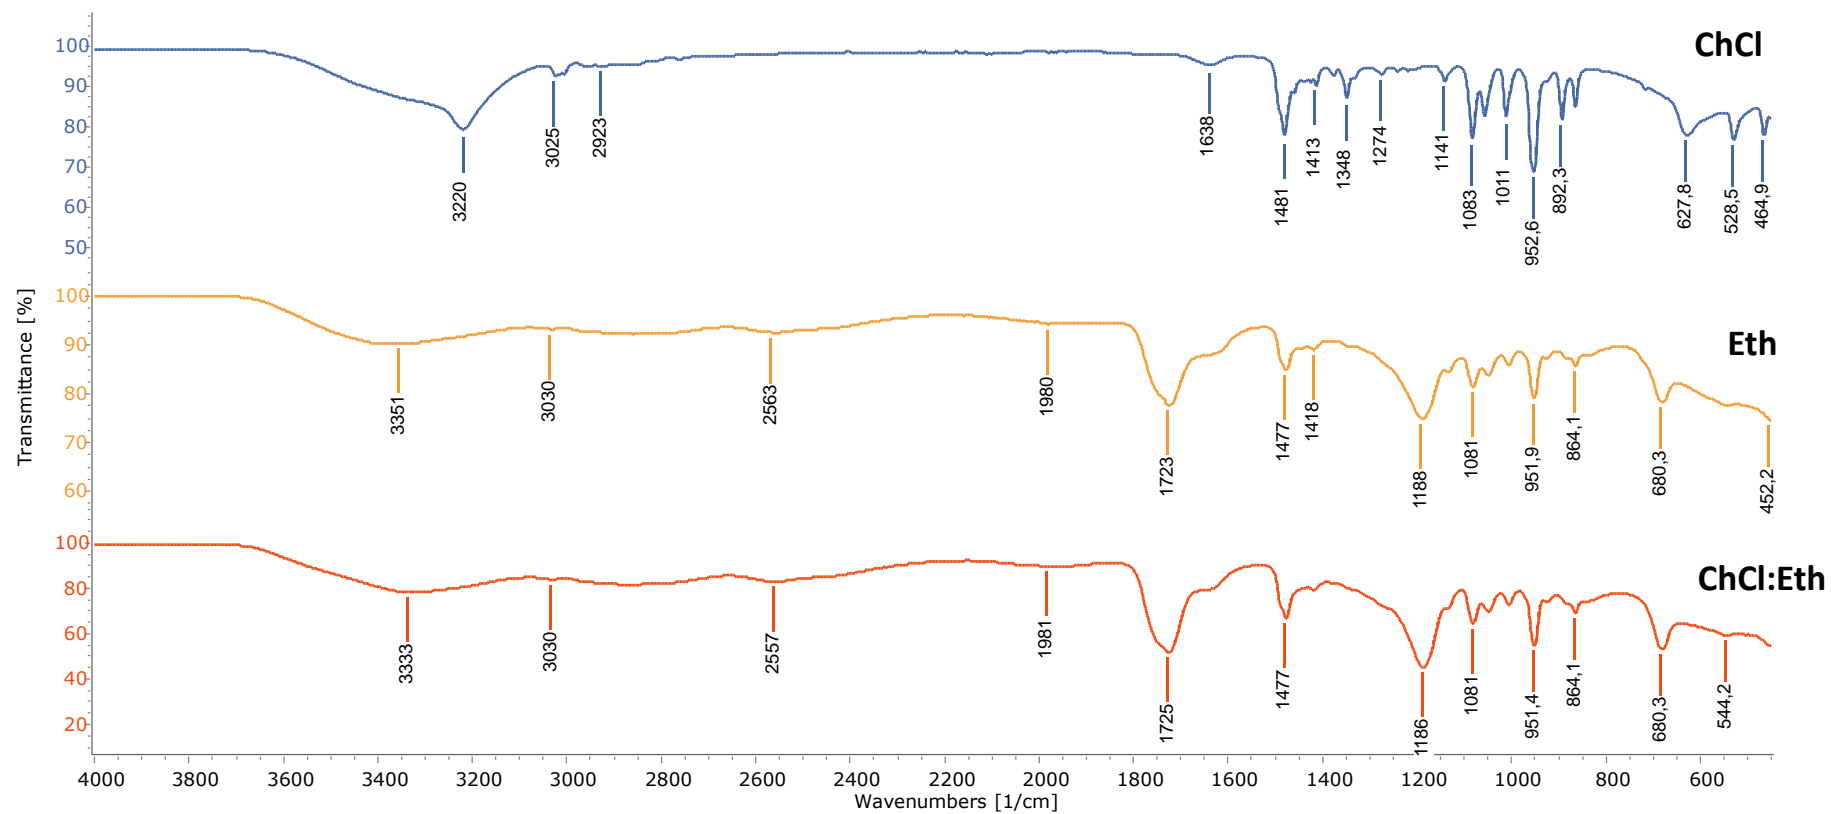

Supplement: s1 [file s1]
